# Supplementary material for: Elucidating symptoms of COVID-19 illness in the Arizona CoVHORT: a longitudinal cohort study
Source: HighWire-hosted journal article supplement (doi:10.1136/bmjopen-2021-053403), 2022-01-01
Supplement: bmjopen-2021-053403supp001_data_supplement.pdf [file bmjopen-2021-053403supp001_data_supplement.pdf]

Supplemental Table 1: Sensitivity and Specificity of COVID-19 symptoms

| Reported symptoms<br>at study entry            | COVID-19<br>positive <sup>1</sup> | COVID-19<br>negative <sup>3</sup> | Sensitivity | Specificity |
|------------------------------------------------|-----------------------------------|-----------------------------------|-------------|-------------|
|                                                | n= 1,155<br>n (%)                 | n= 930<br>n (%)                   |             |             |
| Fatigue                                        | 957 (82.9)                        | 680 (73.1)                        | 82.9        | 26.9        |
| Headache                                       | 861 (74.6)                        | 495 (53.2)                        | 74.6        | 46.8        |
| Aches and pains or<br>sore muscles             | 766 (66.3)                        | 506 (54.4)                        | 66.3        | 45.6        |
| Loss of smell/taste                            | 725 (62.8)                        | 119 (12.8)                        | 62.8        | 87.2        |
| Cough                                          | 716 (61.9)                        | 540 (58.1)                        | 62.0        | 41.9        |
| Fever                                          | 610 (52.8)                        | 452 (48.6)                        | 52.8        | 51.4        |
| Runny nose/cold-like<br>symptoms               | 684 (59.2)                        | 451 (48.5)                        | 59.2        | 51.5        |
| Chills                                         | 563 (48.7)                        | 339 (36.5)                        | 48.7        | 63.6        |
| Sore throat                                    | 543 (47.0)                        | 507 (54.5)                        | 47.0        | 45.5        |
| Difficulty breathing<br>or shortness of breath | 475 (41.1)                        | 319 (34.3)                        | 41.1        | 65.7        |
| Diarrhea                                       | 348 (30.1)                        | 162 (17.4)                        | 30.1        | 82.6        |
| Nausea                                         | 326 (28.2)                        | 129 (13.9)                        | 28.2        | 86.1        |
| Chest pain or<br>pressure                      | 362 (31.3)                        | 246 (26.5)                        | 31.3        | 73.6        |
| Bone pain/nerve pain                           | 212 (18.4)                        | 66 (7.1)                          | 18.4        | 92.9        |
| Vomiting                                       | 92 (8.0)                          | 44 (4.7)                          | 8.0         | 95.3        |
| Other                                          | 101 (8.7)                         | 32 (3.4)                          | 8.7         | 96.6        |
| Rash on skin                                   | 82 (7.1)                          | 38 (4.1)                          | 7.1         | 95.9        |
| Discoloration of<br>fingers/toes               | 29 (2.5)                          | 18 (1.9)                          | 2.5         | 98.1        |
| Loss of speech or<br>movement                  | 12 (1.0)                          | 7 (0.8)                           | 1.0         | 99.3        |
| Conjunctivitis                                 | 26 (2.3)                          | 28 (3.0)                          | 2.3         | 97.0        |
